## **Multiplexing droplet-based single cell RNA-sequencing using natural genetic barcodes**

**Authors:** Hyun Min Kang\*<sup>§</sup>, Meena Subramaniam<sup>§</sup>, Sasha Targ<sup>§</sup>, Michelle Nguyen, Lenka Maliskova, Eunice Wan, Simon Wong, Lauren Byrnes, Cristina Lanata, Rachel Gate, Sara Mostafavi, Alexander Marson, Noah Zaitlen, Lindsey A Criswell, Jimmie Ye\*

1           The confluence of microfluidic and sequencing technologies has enabled profiling of the  
2 transcriptome<sup>1, 2</sup>, epigenome<sup>3</sup>, and chromatin conformation of single cells<sup>4</sup> at an  
3 unprecedented scale. Initial applications of single cell RNA-sequencing have characterized  
4 cellular heterogeneity in tumors<sup>5, 6</sup>, tissues<sup>7, 8</sup>, and response to stimulation<sup>9</sup>. More recently,  
5 droplet-based technologies have significantly increased the throughput of single cell capture  
6 and library preparation<sup>1, 10</sup>, enabling transcriptome sequencing of thousands of cells from one  
7 microfluidic reaction.

8           While improvements in biochemistry<sup>11, 12</sup> and microfluidics<sup>13, 14</sup> continue to increase the  
9 number of cells that can be sequenced per sample, for many applications (e.g. differential  
10 expression and genetic studies), sequencing thousands of cells each from many individuals  
11 would better capture interindividual variability than sequencing more cells from a few  
12 individuals. However, in standard workflows, running a separate microfluidic reaction for each  
13 sample remains cost prohibitive<sup>15</sup>. Multiplexing could significantly reduce the per sample cost  
14 by allowing cells from several individuals to be processed simultaneously, and reduce the per  
15 cell cost by allowing higher flow rates due to the ability to detect and exclude doublets that  
16 contain cells from two different individuals. Further, sample multiplexing limits the technical  
17 variability associated with sample and library preparation, improving statistical power to  
18 accurately estimate true biological effects<sup>16</sup>.

19           We present a simple experimental design and computational algorithm, demuxlet, to  
20 multiplex samples in dscRNA-seq without additional experimental modification (**Fig. 1A**). While  
21 strategies to demultiplex cells from different species<sup>1, 10, 17</sup> or host and graft samples<sup>17</sup> have  
22 been reported, no method is available for simultaneous demultiplexing and doublet detection

23 of cells from > 2 individuals. Inspired by models and algorithms developed for contamination  
24 detection in DNA sequencing data<sup>18</sup>, demuxlet is fast, accurate, scalable and works with  
25 standard input formats<sup>17, 19, 20</sup>.

26 At the heart of our strategy is a statistical model for predicting the probability of  
27 observing a consistent ‘genetic barcode’, a set of single nucleotide polymorphisms (SNPs), in  
28 the RNA-seq reads of a single cell and the genotypes (from SNP genotyping, imputation or DNA  
29 sequencing) of donor samples. The model accounts for the base quality score of the RNA-  
30 sequencing reads as previously described<sup>18</sup> and genotype uncertainties at unobserved SNPs  
31 from imputation to large reference panels<sup>21</sup>. It then uses maximum likelihood to determine the  
32 most likely sample identity for each cell using a mixture model. A small number of reads  
33 overlapping common SNPs is sufficient to accurately identify the sample of origin. For a pool of  
34 8 samples, 4 SNPs can uniquely assign a cell to the donor of origin (**Fig. 1B**), and 20 SNPs each  
35 with minor allele frequency (MAF) of 50% can distinguish every sample with 98% probability.

36 The mixture model in demuxlet also uses genetic information to identify doublets  
37 containing two cells from different individuals, which comprise most droplets containing  
38 multiple cells. By multiplexing even a small number of samples, a doublet will have a high  
39 probability ( $1 - 1/N$ , e.g. 87.5% for  $N = 8$  samples) of containing cells from two individuals which  
40 is detectable by the demuxlet model (**Fig. 1C**). The ability to recover the sample identity of each  
41 cell (“demuxing”) and identify most doublets enables experimental designs that significantly  
42 increase the per sample throughput of current dscRNA-seq workflows.

43 We first assess the feasibility of our strategy and the performance of demuxlet by  
44 analyzing multiplexed peripheral blood mononuclear cells (PBMCs) from 8 patients with

45 systemic lupus erythematosus (SLE). Using a sequential pooling strategy, three pools of  
46 equimolar concentrations of cells were generated (W1: patients S1-S4, W2: patients S5-S8 and  
47 W3: patients S1-S8) and each loaded in a well on a 10X Chromium Single Cell instrument (**Fig.**  
48 **2A**). 3,645, 4,254 and 6,205 single cells were obtained from each well and sequenced to an  
49 average depth of 23k, 17k and 13k reads per cell.

50 Demuxlet identified 91% (3332/3645), 91% (3864/4254), and 86% (5348/6205) of  
51 droplets as singlets from wells W1, W2 and W3, respectively. 25% (+/- 2.6%), 25% (+/- 4.6%)  
52 and 12.5% (+/- 1.4%) of singlets from wells W1, W2 and W3 mapped to each donor, consistent  
53 with equal mixing of 8 individuals. We estimate an error rate (number of cells assigned to  
54 individuals not in the mixture) of 2/3332 (W1) and 0/3864 (W2) singlets by analyzing wells W1  
55 and W2, each containing cells from two disjoint sets of 4 individuals (**Fig. 2B**), suggesting > 99%  
56 of singlets were assigned to individuals correctly.

57 We next assess the ability of demuxlet to detect doublets in both simulated and real  
58 data. 466/3645 (13%) cells were simulated as synthetic doublets by setting the cellular  
59 barcodes of two sets of 466 cells from individuals S1 and S2 to be the same. Applied to the  
60 simulated data, demuxlet identified 91% (426/466) of synthetic doublets as doublets or  
61 ambiguous, correctly recovering the sample identity of both cells in 403/426 (95%) doublets  
62 (**fig. S1**). Applied to real data from W1, W2 and W3, demuxlet identified 138/3645, 165/4254,  
63 and 384/6205 doublets, corresponding to 5.0%, 5.2% and 7.1%, consistent with the linear  
64 relationship between the number of cells sequenced and doublet rates estimated using a mixed  
65 species experiment (**Fig. 2C**).

66 Sample demultiplexing enables individual-specific visualization of single cell data we call  
67 'drop prints'. While both variability in cell type proportion and gene expression have been  
68 previously observed in PBMCs, it has not been possible to fully control for batch effects due to  
69 separate processing of samples<sup>22, 23</sup>. Singlets identified by demuxlet in all three wells cluster  
70 into known PBMC subpopulations (**Fig. 2D**) and are not confounded by well to well effects (**fig.**  
71 **S2A**). While we found 6 differentially expressed genes (FDR < 0.05) between wells W1 and W2,  
72 only 2 genes were differentially expressed in well W3 between W1 and W2 individuals (FDR <  
73 0.05) (**fig. S2B**) suggesting sample multiplexing could reduce confounding such as library  
74 preparation batch effects. Furthermore, for the same individuals, drop prints from two  
75 different wells are qualitatively consistent, the estimates of cell type proportions for the same  
76 individuals in W1 or W2 and W3 are highly correlated (R = 0.99) (**Fig. 2E** and **fig. S3**), and the  
77 inferred cell type-specific expression profiles are correlated with bulk sequencing of sorted cell  
78 populations (R=0.76-0.92) (**fig. S4**). These results demonstrate that demuxlet recovers the  
79 sample identity of single cells with high accuracy, identifies doublets at the expected rate, and  
80 can allow for comparison of individuals within and across wells.

81 Demuxlet enables multiplexed experimental designs that increase the sample  
82 throughput for profiling of interindividual responses across a variety of conditions. We applied  
83 such a multiplexing strategy to characterize cell type-specific responses to IFN- $\beta$ , a potent  
84 cytokine that induces genome-scale changes in the transcriptional profiles of immune cells<sup>24, 25</sup>.  
85 From 8 lupus patients, 1M PBMCs each were isolated, sequentially pooled, and divided in two  
86 aliquots. One sample was activated with recombinant IFN- $\beta$  for 6 hours, a time point we  
87 previously found to maximize the expression of interferon-sensitive genes (ISGs) in dendritic

88 cells (DCs) and T cells<sup>26,27</sup>. A matched control sample was also cultured for 6 hours. From this  
89 experiment, we captured and sequenced 14,619 control and 14,446 stimulated cells.

90 In control and stimulated experiments, demuxlet identified 83% (12138/14619) and 84%  
91 (12167/14446) of droplets as singlets, and recovered the sample identity of 99% (12127/12138  
92 and 12155/12167) of singlets. Detected doublets form distinct clusters in t-SNE space at the  
93 periphery of other cell types, indicative of the expected enrichment of doublets for mixed cell  
94 types in a heterogeneous population (**fig. S5**). The estimated doublet rate of 10.9% is consistent  
95 with predicted rates based on the number of cells recovered, and the observed proportion of  
96 doublets from each pair of individuals is highly correlated with the expected proportions  
97 ( $R=0.98$ ) (**Fig. 2C** and **fig. S6**).

98 Demultiplexing individuals enables the use of the 8 samples within a pool as biological  
99 replicates to quantitatively assess cell type-specific responses to IFN- $\beta$  stimulation. Consistent  
100 with previous reports from bulk RNA-sequencing data, IFN- $\beta$  stimulation induces widespread  
101 transcriptomic changes observed as a shift in the t-SNE projections of singlets (**Fig. 3A**)<sup>24</sup>. After  
102 assigning each singlet to a reference cell population<sup>17</sup>, we identified 2,686 differentially  
103 expressed genes ( $\log_{2}FC > 2$ ,  $FDR < 0.05$ ) in at least one cell type in response to IFN- $\beta$  stimulation  
104 (**table S1**). These genes cluster into modules of cell type-specific responses enriched for distinct  
105 gene regulatory processes (**Fig. 3B, table S2**). For example, the two clusters of upregulated  
106 genes, pan-leukocyte (Cluster III: 401 genes,  $\log_{2}FC > 2$ ,  $FDR < 0.05$ ) and CD14<sup>+</sup> specific (Cluster I:  
107 767 genes,  $\log_{2}FC > 2$ ,  $FDR < 0.05$ ), were enriched for general antiviral response (e.g. KEGG  
108 Influenza A: Cluster III  $P < 1.6 \times 10^{-5}$ ), chemokine signaling (Cluster I  $P < 7.6 \times 10^{-3}$ ) and genes  
109 implicated in SLE (Cluster I  $P < 4.4 \times 10^{-3}$ ). The five clusters of downregulated genes were

110 enriched for antibacterial response (KEGG Legionellosis: Cluster II monocyte down  $P < 5.5 \times 10^{-3}$ )  
111 and natural killer cell mediated toxicity (Cluster IV NK/Th cell down:  $P < 3.6 \times 10^{-2}$ ). The  
112 differential expression using cell type-specific estimates from single cell data recovers known  
113 gene regulatory programs affected by interferon stimulation.

114 We next characterize interindividual variability in PBMC expression at baseline and in  
115 response to IFN- $\beta$  stimulation. In both control and stimulated cells, the variance of mean  
116 expression among individuals is substantially higher than expected from synthetic replicates  
117 (**Fig. 3C**). As previously reported<sup>22, 28</sup>, cell type proportion varied significantly among individuals  
118 and contributes to variability in gene expression (**fig. S7**). The variance estimated from synthetic  
119 replicates with matched cell type proportions is more concordant with the observed variance  
120 (Lin's concordance = 0.54 versus 0.022, Pearson correlation = 0.78 versus 0.69, **Fig. 3C-D**).  
121 However, comparing mean expression from synthetic replicates within cell types (Lin's  
122 concordance = 0.007 - 0.20, Pearson correlation = 0.27 - 0.68) shows that there is  
123 interindividual variability not explained simply by cell type proportion (**fig. S8**).

124 We then explored interindividual variability in expression within one cell type,  
125 CD14<sup>+</sup>CD16<sup>-</sup> monocytes. The correlation of mean expression between pairs of synthetic  
126 replicates from the same individual (>99%) was greater than between different individuals  
127 (~97%), indicating variation beyond sampling (**Fig. 3E**). We found 585 genes that have  
128 significant interindividual variability in stimulated CD14<sup>+</sup> CD16<sup>-</sup> monocytes and 827 in control by  
129 correlating the synthetic replicates across individuals (Pearson correlation, FDR < 0.05). The  
130 variable genes in stimulated CD14<sup>+</sup>CD16<sup>-</sup> monocytes and to a lesser extent in CD4<sup>+</sup> T cells ( $P <$   
131  $9.3 \times 10^{-4}$  and  $4.5 \times 10^{-2}$ , hypergeometric test, **Fig. 3F**) are enriched for differentially expressed

132 genes, consistent with our previous discovery of more IFN- $\beta$  response-eQTLs in monocyte-  
133 derived dendritic cells than CD4<sup>+</sup> T cells<sup>26, 27</sup>. We hypothesize that natural genetic variation  
134 could explain interindividual variability in gene expression in our multiplexed data. For example,  
135 schlafen family member 5 (SLFN5) and guanylate binding protein 3 (GBP3) expression are highly  
136 correlated between replicates after IFN- $\beta$  stimulation (R=0.92, P < 0.0011 and 0.80, P < 0.017).  
137 The average expression of the two synthetic replicates are associated with known eQTLs in  
138 CD14<sup>+</sup> monocytes and lymphoblastoid cell lines, respectively (SLFN5: rs11080327 P < 3.1x10<sup>-4</sup>,  
139 GBP3: rs10493821 P < 2.1x10<sup>-2</sup>, **Fig. 3G**)<sup>26, 29</sup>. These results suggest that single cell sequencing  
140 recovers repeatable interindividual variation in gene expression and in two genes, is associated  
141 with known genetic determinants.

142 We introduce demuxlet, a new computational method that enables simple and efficient  
143 sample multiplexing for dscRNA-seq, validate its performance in simulated and real data, and  
144 characterize single cell expression of PBMCs from SLE patients in several different conditions.  
145 Our results demonstrate demuxlet provides reliable estimation of cell type proportion across  
146 individuals, recovers cell type-specific transcriptional programs from mixed populations  
147 consistent with previous reports, and identifies genes with interindividual variability<sup>24</sup>. The  
148 capability to demultiplex and identify doublets using natural genetic variation significantly  
149 reduces the per-sample and per-cell cost of single-cell RNA-sequencing, does not require  
150 synthetic barcodes or split-pool strategies<sup>30-34</sup>, and captures biological variability among  
151 individual samples while limiting the effects of unwanted technical variability.

152 The application of single cell sequencing methods such as dscRNA-seq to larger numbers  
153 of individuals is a promising approach to characterizing cellular heterogeneity among



154 individuals at baseline and in different environmental conditions, a crucial area for further  
155 understanding of health and disease<sup>35-37</sup>. Experimental and computational methods for reliable  
156 and efficient sample multiplexing could enable broad adoption of droplet-based RNA-seq for  
157 population-scale studies, facilitating genetic and longitudinal analyses in relevant cell types and  
158 conditions across a range of sampled individuals<sup>38</sup>.

Fig. 1

A.

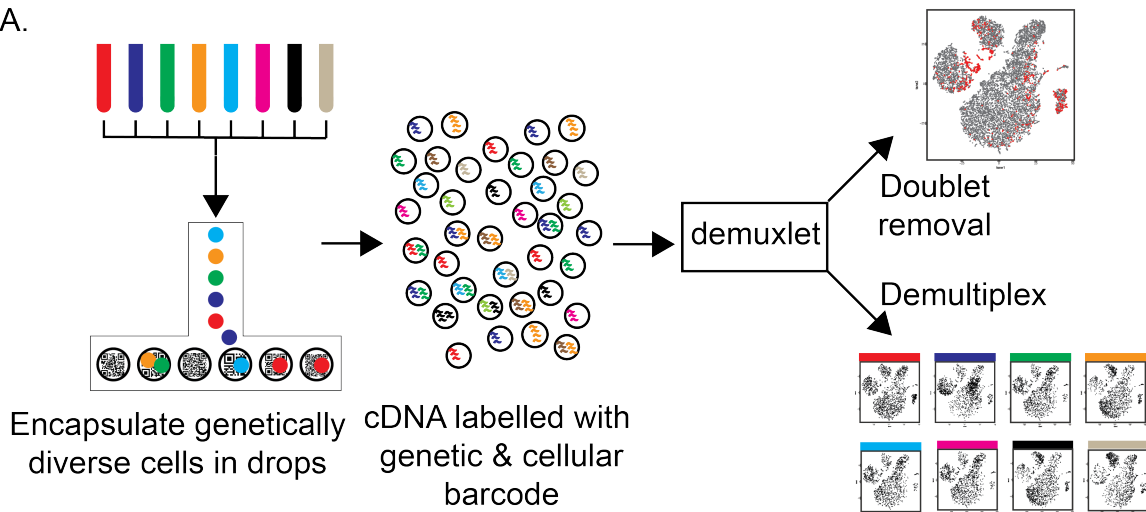

B.

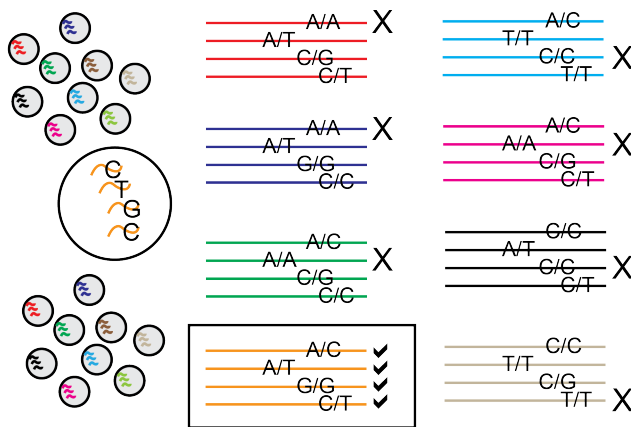

C.

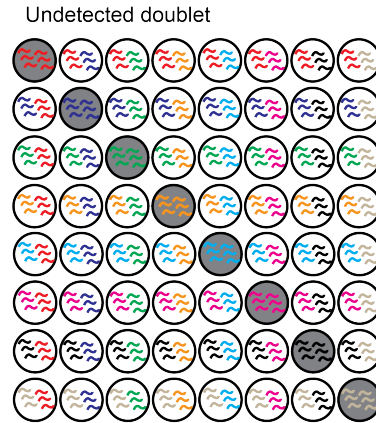

159

160 **Figure 1 – Demuxlet: demultiplexing and doublet identification from single cell data.**

161 A) Pipeline for experimental multiplexing of unrelated individuals, loading onto droplet-based  
 162 single cell RNA-sequencing instrument, and computational demultiplexing (demux) and doublet  
 163 removal using demuxlet. Assuming equal mixing of 8 individuals, B) 4 genetic variants can  
 164 recover the sample identity of a cell, and C) 87.5% of doublets will contain cells from two  
 165 different samples.

Figure 2

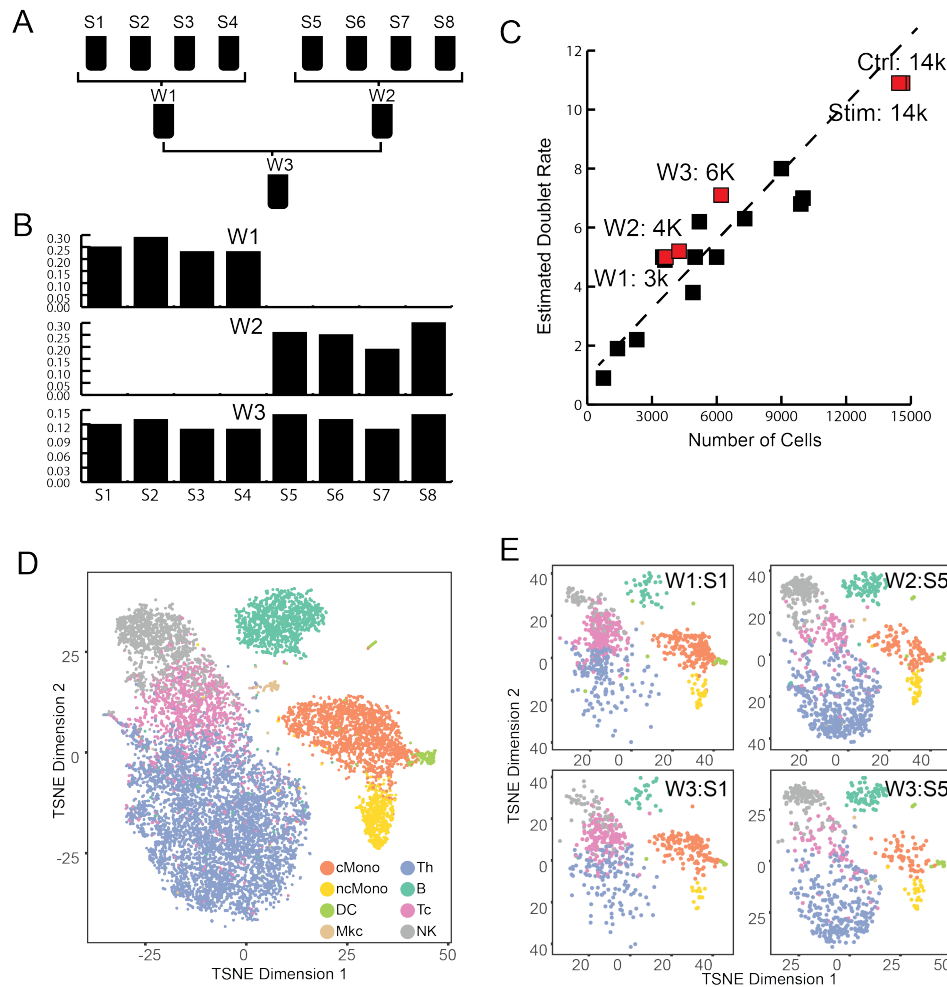

166

167 **Figure 2 – Performance of demuxlet.** A) Experimental design for equimolar pooling of cells  
168 from 8 unrelated samples (S1-S8) into three wells (W1-W3). W1 and W2 contain cells from two  
169 disjoint sets of 4 individuals. W3 contains cells from all 8 individuals. B) Demultiplexing single  
170 cells in each well recovers the expected individuals. C) Estimates of doublet rates versus  
171 previous estimates from mixed species experiments. D) Cell type identity determined by  
172 prediction to previously annotated PBMC data. E) t-SNE plot of two individuals (S1 and S5) from  
173 different wells are qualitatively concordant.

Figure 3

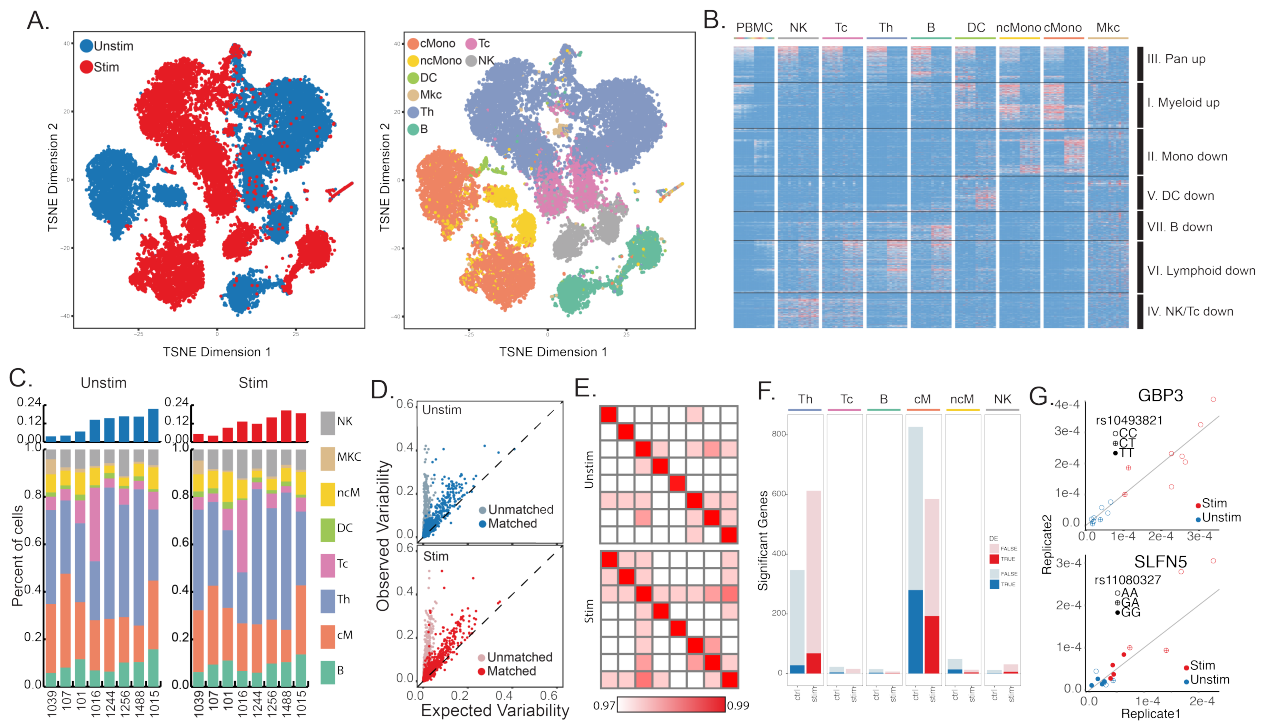

174

175 **Figure 3 – Interindividual variability in IFN-β response.** A) t-SNE plot of unstimulated (blue) and

176 IFN-β-stimulated (red) PBMCs and the estimated cell types. B) Cell type-specific expression in

177 stimulated (left) and unstimulated (right) cells. Differentially expressed genes shown (FDR <

178 0.05,  $|\log(\text{FC})| > 1$ ). Each column represents cell type-specific expression for each individual

179 from demuxlet. C) Cell type proportions for each individual in unstimulated and stimulated

180 cells. D) Observed variance (y-axis) in mean expression over all PBMCs from each individual

181 versus expected variance (x-axis) over synthetic replicates sampled across all cells (light blue,

182 pink) or replicates matched for cell type proportion (blue, red). E) Correlation between sample

183 replicates in control and stimulated cells. F) Number of significantly variable genes in each cell

184 type and condition. G) Mean expression of SLFN5 and GPB3 in two sample replicates labeled by

185 genotype.

186 **Methods**

187 Identifying the sample identity of each single cell.

188 We first describe the method to infer the sample identity of each cell in the absence of  
189 doublets. Consider RNA-sequence reads from  $C$  barcoded droplets multiplexed across  $S$   
190 different samples, where their genotypes are available across  $V$  exonic variants. Let  $d_{cv}$  be the  
191 number of unique reads overlapping with the  $v$ -th variant from the  $c$ -th droplet. Let  $b_{cvi} \in$   
192  $\{R, A, O\}$ ,  $i \in \{1, \dots, d_{cv}\}$  be the variant-overlapping base call from the  $i$ -th read, representing  
193 reference (R), alternate (A), and other (O) alleles respectively. Let  $e_{cvi} \in \{0, 1\}$  be a latent  
194 variable indicating whether the base call is correct (0) or not (1), then given  $e_{cvi} = 0$ ,  $b_{cvi} \in$   
195  $\{R, A\}$  and  $\sim \text{Binomial}\left(2, \frac{g}{2}\right)$  when  $g \in \{0, 1, 2\}$  is the true genotype of sample corresponding  
196 to  $c$ -th droplet at  $v$ -th variant. When  $e_{cvi} = 1$ , we assume that  $\Pr(b_{cvi}|g, e_{cvi})$  follows table S3.  
197  $e_{cvi}$  is assumed to follow Bernoulli  $\left(10^{-\frac{q_{cvi}}{10}}\right)$  where  $q_{cvi}$  is a phred-scale quality score of the  
198 observed base call.

199 We allow uncertainty of observed genotypes at the  $v$ -th variant for the  $s$ -th sample  
200 using  $P_{sv}^{(g)} = \Pr(g|\text{Data}_{sv})$ , the posterior probability of a possible genotype  $g$  given external  
201 DNA data  $\text{Data}_{sv}$  (e.g. sequence reads, imputed genotypes, or array-based genotypes). If  
202 genotype likelihood  $\Pr(\text{Data}_{sv}|g)$  is provided (e.g. unphased sequence reads) instead, it can be  
203 converted to a posterior probability scale using  $P_{sv}^{(g)} = \Pr(\text{Data}_{sv}|g)\Pr(g)$  where  
204  $\Pr(g) \sim \text{Binomial}(2, p_v)$  and  $p_v$  is the population allele frequency of the alternate allele. To  
205 allow errors  $\varepsilon$  in the posterior probability, we replace it to  $(1 - \varepsilon)P_{sv}^{(g)} + \varepsilon\Pr(g)$ . The overall  
206 likelihood that the  $c$ -th droplet originated from the  $s$ -th sample is

$$L_c(s) = \prod_{v=1}^V \left[ \sum_{g=0}^2 \left\{ \prod_{i=1}^{d_{cv}} \left( \sum_{e=0}^1 \Pr(b_{cvi}|g, e) \right) P_{sv}^{(g)} \right\} \right] \quad (1)$$

207 In the absence of doublets, we use the maximum likelihood to determine the best-matching  
208 sample as  $\operatorname{argmax}_s [L_c(s)]$ .

209

### 210 Screening for droplets containing multiple samples.

211 To identify doublets, we implement a mixture model to calculate the likelihood that the  
212 sequence reads originated from two individuals, and the likelihoods are compared to determine  
213 whether a droplet contains cells from one or two samples. If sequence reads from the  $c$ -th  
214 droplet originate from two different samples,  $s_1, s_2$  with mixing proportions  $(1 - \alpha) : \alpha$ , then  
215 the likelihood in (1) can be represented as the following mixture distribution<sup>18</sup>,

$$216 \quad L_c(s_1, s_2, \alpha) = \prod_{v=1}^V \left[ \sum_{g_1, g_2} \left\{ \prod_{i=1}^{d_{cv}} \left( \sum_{e=0}^1 (1 - \alpha) \Pr(b_{cvi}|g_1, e) + \alpha \Pr(b_{cvi}|g_2, e) \right) P_{sv}^{(g_1)} P_{sv}^{(g_2)} \right\} \right]$$

217 To reduce the computational cost, we consider discrete values of  $\alpha \in \{\alpha_1, \dots, \alpha_M\}$ , (e.g.

218 5 - 50% by 5%). We determine that it is a doublet between samples  $s_1, s_2$  if and only if

$$219 \quad \frac{\max_{s_1, s_2, \alpha} L_c(s_1, s_2, \alpha)}{\max_s L_c(s)} \geq t \text{ and the most likely mixing proportion is estimated to be}$$

220  $\operatorname{argmax}_\alpha L_c(s_1, s_2, \alpha)$ . We determine that the cell contains only a single individual  $s$  if

$$221 \quad \frac{\max_{s_1, s_2, \alpha} L_c(s_1, s_2, \alpha)}{\max_s L_c(s)} \leq \frac{1}{t}. \text{ The less confident droplets, we classify cells as ambiguous. While we}$$

222 consider only doublets for estimating doublet rates, we remove all doublets and ambiguous

223 droplets to conservatively estimate singlets. Figure S1 illustrates the distribution of singlet,

224 doublet likelihoods and the decision boundaries when  $t = 2$  was used.

225

### 226 Isolation and preparation of PBMC samples.

227 Peripheral blood mononuclear cells were isolated from patient donors, Ficoll separated, and  
228 cryopreserved by the UCSF Core Immunologic Laboratory (CIL). PBMCs were thawed in a 37°C  
229 water bath, and subsequently washed and resuspended in EasySep buffer. Cells were treated  
230 with DNaseI and incubated for 15 min at RT before filtering through a 40um column. Finally,  
231 the cells were washed in EasySep and resuspended in 1x PBMS and 0.04% bovine serum  
232 albumin. Cells from 8 donors were then re-concentrated to 1M cells per mL and then serially  
233 pooled. At each pooling stage, 1M cells per mL were combined to result in a final sample pool  
234 with cells from all donors.

235

#### 236 *IFN- $\beta$ stimulation and culture.*

237 Prior to pooling, samples from 8 individuals were separated into two aliquots each. One aliquot  
238 of PBMCs was activated by 100 U/mL of recombinant IFN- $\beta$  (PBL Assay Science) for 6 hours  
239 according to the published protocol<sup>26</sup>. The second aliquot was left untreated. After 6 hours, the  
240 8 samples for each condition were pooled together in two final pools (stimulated cells and  
241 control cells) as described above.

242

#### 243 *Droplet-based capture and sequencing.*

244 Cellular suspensions were loaded onto the 10x Chromium instrument (10x Genomics) and  
245 sequenced as described in Zheng et al<sup>17</sup>. The cDNA libraries were sequenced using a custom  
246 program on 10 lanes of Illumina HiSeq 2500 Rapid Mode, yielding 1.8B total reads and 25K  
247 reads per cell. At these depths, we recovered > 90% of captured transcripts in each sequencing  
248 experiment.

249

250 *Bulk isolation and sequencing.*

251 PBMCs from lupus patients were isolated and prepared as described above. Once resuspended  
252 in EasySep buffer, the EasyEights Magnet was used to sequentially isolate CD14<sup>+</sup> (using the  
253 EasySep Human CD14 positive selection kit II, cat #17858), CD19<sup>+</sup> (using the EasySep Human  
254 CD19 positive selection kit II, cat #17854), CD8<sup>+</sup> (EasySep Human CD8 positive selection kitII,  
255 cat#17853), and CD4<sup>+</sup> cells (EasySep Human CD4 T cell negative isolation kit (cat #17952)  
256 according to the kit protocol. RNA was extracted using the RNeasy Mini kit (#74104), and  
257 reverse transcription and tagmentation were conducted according to Picelli et al. using the  
258 SmartSeq2 protocol<sup>39, 40</sup>. After cDNA synthesis and tagmentation, the library was amplified with  
259 the Nextera XT DNA Sample Preparation Kit (#FC-131-1096) according to protocol, starting with  
260 0.2ng of cDNA. Samples were then sequenced on one lane of the Illumina HiSeq 4000 with  
261 paired end 100bp read length, yielding 350M total reads.

262

263 *Alignment and initial processing of single cell sequencing data.*

264 We used the CellRanger v1.1 and v1.2 software with the default settings to process the raw  
265 FASTQ files, align the sequencing reads to the hg19 transcriptome, and generate a filtered UMI  
266 expression profile for each cell<sup>17</sup>. The raw UMI counts from all cells and genes with nonzero  
267 counts across the population of cells were used to generate t-SNE profiles.

268

269 *Cell type classification and clustering.*



270 To identify known immune cell populations in PBMCs, we used the Seurat package to perform  
271 unbiased clustering on the 2.7k PBMCs from Zheng et al., following the publicly available  
272 Guided Clustering Tutorial<sup>17, 41</sup>. The FindAllMarkers function was then used to find the top 20  
273 markers for each of the 8 identified cell types. Cluster averages were calculated by taking the  
274 average raw count across all cells of each cell type. For each cell, we calculated the Spearman  
275 correlation of the raw counts of the marker genes and the cluster averages, and assigned each  
276 cell to the cell type to which it had maximum correlation.

277

#### 278 Differential expression analysis.

279 Demultiplexed individuals were used as replicates for differential expression analysis. For each  
280 gene, raw counts were summed for each individual. We used the DESeq2 package to detect  
281 differentially expressed genes between control and stimulated conditions<sup>42</sup>. Genes with  
282 baseMean > 1 were filtered out from the DESeq2 output, and the qvalue package was used to  
283 calculate FDR < 0.05<sup>43</sup>.

284

#### 285 Estimation of interindividual variability in PBMCs.

286 For each individual, we found the mean expression of each gene with nonzero counts. The  
287 mean was calculated from the log2 single cell UMI counts normalized to the median count for  
288 each cell. To measure interindividual variability, we then calculated the variance of the mean  
289 expression across all individuals. Lin's concordance correlation coefficient was used to compare  
290 the agreement of observed data and synthetic replicates. Synthetic replicates were generated  
291 by sampling without replacement either from all cells or cells matched for cell type proportion.

292 Estimation of interindividual variability within cell types.

293 For each cell type, we generated two bulk equivalent replicates for each individual by summing  
294 raw counts of cells sampled without replacement. We used DESeq2 to generate variance-  
295 stabilized counts across all replicates. To filter for expressed genes, we performed all  
296 subsequent analyses on genes with 5% of samples with > 0 counts. The correlation of replicates  
297 and QTL detection was performed on the log2 normalized counts. Pearson correlation of the  
298 two replicates from each of the 8 individuals was used to find genes with significant  
299 interindividual variability.

300

301 Single cell and bulk RNA-sequencing data has been deposited in the Gene Expression Omnibus  
302 under the accession number GSE96583. Demuxlet software is freely available at

303 <https://github.com/hyunminkang/apigenome>.

304

- 305 1. Macosko, E.Z. et al. Highly parallel genome-wide expression profiling of individual cells  
306 using nanoliter droplets. *Cell*, **161** 1202-1214 (2015).
- 307 2. Pollen, A.A. et al. Low-coverage single-cell mRNA sequencing reveals cellular  
308 heterogeneity and activated signaling pathways in developing cerebral cortex. *Nat*  
309 *Biotech* **32**, 1053-1058 (2014).
- 310 3. Buenrostro, J.D. et al. Single-cell chromatin accessibility reveals principles of regulatory  
311 variation. *Nature*, **523** 486-490 (2015).
- 312 4. Nagano, T. et al. Single-cell Hi-C reveals cell-to-cell variability in chromosome structure.  
313 *Nature*, **502** 59-64 (2013).
- 314 5. Patel, A.P. et al. Single-cell RNA-seq highlights intratumoral heterogeneity in primary  
315 glioblastoma. *Science*, **344** 1396-1401 (2014).
- 316 6. Tirosh, I. et al. Dissecting the multicellular ecosystem of metastatic melanoma by single-  
317 cell RNA-seq. *Science*, **352** 189-196 (2016).
- 318 7. Muraro, M.J. et al. A single-cell transcriptome atlas of the human pancreas. *Cell Syst* **3**,  
319 385-394 e383 (2016).
- 320 8. Baron, M. et al. A single-cell transcriptomic map of the human and mouse pancreas  
321 reveals inter- and intra-cell population structure. *Cell Syst* **3**, 346-360 e344 (2016).

- 322 9. Shalek, A.K. et al. Single-cell RNA-seq reveals dynamic paracrine control of cellular  
323 variation. *Nature* **510**, 363–369 (2014).
- 324 10. Klein, A.M. et al. Droplet barcoding for single-cell transcriptomics applied to embryonic  
325 stem cells. *Cell* **161**, 1187-1201 (2015).
- 326 11. Stegle, O., Teichmann, S.A. & Marioni, J.C. Computational and analytical challenges in  
327 single-cell transcriptomics. *Nat Rev Genet* **16**, 133-145 (2015).
- 328 12. Gawad, C., Koh, W. & Quake, S.R. Single-cell genome sequencing: current state of the  
329 science. *Nat Rev Genet* **17**, 175-188 (2016).
- 330 13. Streets, A.M. et al. Microfluidic single-cell whole-transcriptome sequencing. *Proc Natl*  
331 *Acad Sci* **111**, 7048-7053 (2014).
- 332 14. Zilionis, R. et al. Single-cell barcoding and sequencing using droplet microfluidics. *Nat*  
333 *Protoc* **12**, 44-73 (2017).
- 334 15. Ziegenhain, C. et al. Comparative analysis of single-cell RNA sequencing methods. *Mol*  
335 *Cell* **65**, 631-643.e634 (2017).
- 336 16. Hicks, S.C., Teng, M. & Irizarry, R.A. On the widespread and critical impact of systematic  
337 bias and batch effects in single-cell RNA-Seq data. bioRxiv 025528 (2015).
- 338 17. Zheng, G.X.Y. et al. Massively parallel digital transcriptional profiling of single cells. *Nat*  
339 *Commun* **8**, 14049 (2017).
- 340 18. Jun, G. et al. Detecting and estimating contamination of human DNA samples in  
341 sequencing and array-based genotype data. *Am J Hum Genet* **91**, 839-848 (2012).
- 342 19. Danecek, P. et al. The variant call format and VCFtools. *Bioinformatics* **27**, 2156-2158  
343 (2011).
- 344 20. Li, H. et al. The sequence alignment/map format and SAMtools. *Bioinformatics* **25**, 2078-  
345 2079 (2009).
- 346 21. Loh, P.R., Palamara, P.F. & Price, A.L. Fast and accurate long-range phasing in a UK  
347 Biobank cohort. *Nat Genet* **48**, 811-816 (2016).
- 348 22. Aguirre-Gamboa, R. et al. Differential effects of environmental and genetic factors on T  
349 and B cell immune traits. *Cell Rep* **17**, 2474-2487.
- 350 23. Li, Y. et al. A functional genomics approach to understand variation in cytokine  
351 production in humans. *Cell* **167**, 1099-1110.e1014 (2016).
- 352 24. Mostafavi, S. et al. Parsing the interferon transcriptional network and its disease  
353 associations. *Cell* **164**, 564-578.
- 354 25. Stark, G.R., Kerr, I.M., Williams, B.R.G., Silverman, R.H. & Schreiber, R.D. How cells  
355 respond to interferon. *Annu Rev Biochem* **67**, 227-264 (2003).
- 356 26. Lee, M.N. et al. Common genetic variants modulate pathogen-sensing responses in  
357 human dendritic cells. *Science* **343**, 1246980-1246980 (2014).
- 358 27. Ye, C.J. et al. Intersection of population variation and autoimmunity genetics in human T  
359 cell activation. *Science* **345**, 1254665-1254665 (2014).
- 360 28. Palmer, C., Diehn, M., Alizadeh, A.A. & Brown, P.O. Cell-type specific gene expression  
361 profiles of leukocytes in human peripheral blood. *BMC Genomics* **7**, 115 (2006).
- 362 29. Lappalainen, T. et al. Transcriptome and genome sequencing uncovers functional  
363 variation in humans. *Nature* **501**, 506-511 (2013).
- 364 30. Cao, J. et al. Comprehensive single cell transcriptional profiling of a multicellular  
365 organism by combinatorial indexing. bioRxiv 104844 (2017).

- 366 31. Dixit, A. et al. Perturb-Seq: Dissecting molecular circuits with scalable single-cell RNA  
367 profiling of pooled genetic screens. *Cell* **167**, 1853-1866.e1817 (2016).
- 368 32. Adamson, B. et al. A Multiplexed single-cell CRISPR screening platform enables  
369 systematic dissection of the unfolded protein response. *Cell* **167**, 1867-1882.e1821  
370 (2016).
- 371 33. Jaitin, D.A. et al. Dissecting immune circuits by linking CRISPR-pooled screens with  
372 single-cell RNA-seq. *Cell* **167**, 1883-1896.e1815 (2016).
- 373 34. Datlinger, P. et al. Pooled CRISPR screening with single-cell transcriptome readout. *Nat*  
374 *Meth* **14**, 297-301 (2017).
- 375 35. Buettner, F. et al. Computational analysis of cell-to-cell heterogeneity in single-cell RNA-  
376 sequencing data reveals hidden subpopulations of cells. *Nat Biotech* **33**, 155-160 (2015).
- 377 36. Tung, P.-Y. et al. Batch effects and the effective design of single-cell gene expression  
378 studies. *Sci Rep* **7**, 39921 (2017).
- 379 37. Tanay, A. & Regev, A. Scaling single-cell genomics from phenomenology to mechanism.  
380 *Nature* **541**, 331-338 (2017).
- 381 38. Wills, Q.F. et al. Single-cell gene expression analysis reveals genetic associations masked  
382 in whole-tissue experiments. *Nat Biotech* **31**, 748-752 (2013).
- 383 39. Picelli, S. et al. Smart-seq2 for sensitive full-length transcriptome profiling in single cells.  
384 *Nat Meth* **10**, 1096-1098 (2013).
- 385 40. Picelli, S. et al. Full-length RNA-seq from single cells using Smart-seq2. *Nat Protoc* **9**, 171-  
386 181 (2014).
- 387 41. Satija, R., Farrell, J.A., Gennert, D., Schier, A.F. & Regev, A. Spatial reconstruction of  
388 single-cell gene expression data. *Nat Biotech* **33**, 495-502 (2015).
- 389 42. Anders, S. & Huber, W. Differential expression analysis for sequence count data.  
390 *Genome Biol* **11**, R106 (2010).
- 391 43. Dabney, A., Storey, J.D. & Warnes, G.R. qvalue: Q-value estimation for false discovery  
392 rate control. *R package version 1* (2010).
